# Supplementary material
Source: ML conference proceedings conference paper supplement (https://openaccess.thecvf.com/content/ICCV2023/html/Li_Gradient-based_Sampling_for_ICCV_2023_paper.html)
Supplement: Supplementary file 1 [file Li_Gradient-based_Sampling_for_ICCV_2023_supplemental.pdf]

# Gradient-based Sampling for Class Imbalanced Semi-supervised Object Detection

## (Supplementary Document)

Anonymous ICCV submission

Paper ID 5153

### 1. Choice of Hyperparameters

We analyze the choice of two hyper-parameters in our approach,  $\gamma$ , and  $\beta$ .

**Choice of  $\beta$ .** We introduce  $\beta$  to prevent the model from overfitting to the small number of labeled data of minority classes. In the training process, the detector is prone to overfit fixed annotations of minority classes. By applying large weights, the predictions for minority classes on the labeled set could be over-confident. Consequently, the positive gradients of these classes become smaller and enforce the class-wise weights to become larger, leading to more serious overfitting. However, this issue is trivial in the unlabeled set. When the weights for a minority class become larger, more pseudo labels are sampled for training, which increases the gradient for this minority class to prevent the model from overfitting. Besides, since the sampling rate of labeled images is always larger than unlabeled images in current SSOD methods, the model tends to overfit with labeled images. Small class weights for labeled data can effectively alleviate overfitting. Thus, we smooth the class weights for labeled images when keeping the weights for unlabeled data the same to balance the positive gradient and negative gradient of each class. We compare the performance of the detector under different  $\beta$  in COCO split1 in Tab.1. When  $\beta$  is set to 1, the performance of minority classes is better than that under  $\beta = 0.5$  by 1.5%, but the performance of majority classes drops by 1.4%. It demonstrates that a larger  $\beta$  is beneficial to minority classes but causes underfitting of majority classes.

**Choice of  $\gamma$ .** Tab.2 illustrates the AP of our detector under different values of  $\gamma$ . In general, our method is not sensitive to the choice of  $\gamma$ . Setting  $\gamma$  to 0.5 leads to a slight performance improvement in minority classes but causes a small performance drop in majority classes. In fact,  $\gamma$  is a parameter depending on the class frequencies of the dataset. As the mean frequency of all classes in MS-COCO  $\rightarrow$  Object365 and LVIS sub-tasks is much smaller, we set a smaller  $\gamma$  for these tasks.

Table 1: Performance comparisons of setting different  $\beta$  on the split1 of MS-COCO sub-task. AP is chosen as the metric.

| $\beta$ | all         | maj         | min         |
|---------|-------------|-------------|-------------|
| 0.3     | <b>26.5</b> | <b>30.8</b> | 13.4        |
| 0.5     | <b>26.5</b> | 30.7        | 13.9        |
| 1       | 25.8        | 29.3        | <b>15.4</b> |

Table 2: Performance comparisons of setting different  $\gamma$  on the split1 of MS-COCO sub-task. AP is chosen as the metric.

| $\gamma$ | all         | maj         | min         |
|----------|-------------|-------------|-------------|
| 0.1      | 26.4        | <b>30.7</b> | 13.5        |
| 0.5      | <b>26.5</b> | <b>30.7</b> | <b>13.9</b> |
| 1        | 26.3        | 30.4        | 14.0        |

### 2. Motivation of Jacobi Iterate Module

By optimizing the equations of

$$w_i \times \tilde{\mathbf{G}}_{ii} = - \sum_{k \neq i} w_k \times \tilde{\mathbf{G}}_{ik} \quad (1)$$

and

$$\sum_{i=1}^{n+1} w_i = n + 1 \quad (2)$$

we obtain a class weights  $w_i (i = 1, 2, \dots, n)$  utilized for the reweighting and thresholding in our method. However, traditional direct solutions to optimize the group of linear equations always obtain a negative weight  $w_i < 0$  in complex tasks such as MS-COCO  $\rightarrow$  Object365 and LVIS sub-tasks. To solve this, we introduce the learnable parameters  $a_i (i = 1, 2, \dots, n + 1)$  with softmax function to obtain  $w_i$  subject to  $w_i > 0$ . To update the value of  $a_i$ , we introduce a loss to mimic the Jacobi iterate method. Experimentally,

Table 3: Performance comparisons of using different sampling strategies on the MS-COCO sub-task. AP is chosen as the metric.

|        | labeled | unlabeled | all         | maj         | min         |
|--------|---------|-----------|-------------|-------------|-------------|
| Random | Random  | Random    | 25.5        | <b>30.9</b> | 9.4         |
| RFS    | Random  | Random    | 25.8        | <b>30.9</b> | 10.5        |
| RFS    | RFS     | RFS       | 26.0        | 30.8        | 11.7        |
| RFS    | RFS     | CrS       | <b>26.5</b> | 30.7        | <b>13.9</b> |

the AP of the detector trained with our Jacobi iterate module (26.5%) is the same as that of the detector trained with direct solution (26.5%) in the MS-COCO sub-task.

### 3. Extended Ablation of Sampling Strategies

We conduct experiments on split1 of the MS-COCO sub-task to further demonstrate the effectiveness of our proposed CrS module. Different sampling strategies are applied to labeled and unlabeled images. According to Tab. 3, our method performs best among all variants. Concretely, we choose the random sampling strategy applied to both labeled and unlabeled data as the baseline, which achieves 30.9% and 9.7% on the majority classes and the minority classes, respectively. Changing the random sampling strategy to RFS increases the performance by 0.4% on all classes, and we choose this RFS variant as our strong baseline. By replacing the RFS on unlabeled data with our proposed CrS module, the performance of minority classes increases by 2.2%, and the performance of all classes also further increases by 0.5%. This demonstrates the superiority of our CrS module over RFS on unlabeled data.

### 4. Analysis of Confirmation Bias

Confirmation bias[1] refers to the phenomenon that the model training is overfitted to the incorrect pseudo labels predicted by the model itself. Here, we present an analysis of confirmation bias in our task. We analyze the confirmation bias in our tasks from two perspectives: (1) the model biased toward majority classes tends to predict pseudo labels biased toward majority classes; (2) the incorrect pseudo labels for minority classes dominate the learning of the model since the ground truth labels in labeled data are scarce for these classes.

To illustrate the first aspect of this phenomenon, we select Top-10 AP classes for both majority classes and minority classes and calculate the precision and recall metrics of pseudo labels of Top-10 classes in both majority classes and minority classes. The results are presented in Fig. 1. Obviously, there is a performance bias towards the majority classes of the baseline (Soft Teacher), which can be seen from the recall metric in Fig. 1 (b). This manifests that the detector is leaning towards generating more pseudo labels

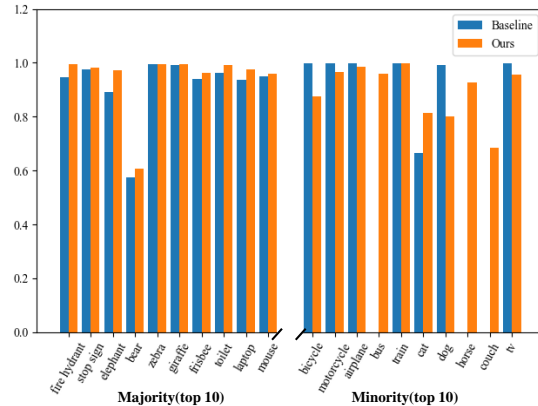

(a) Precision of pseudo labels

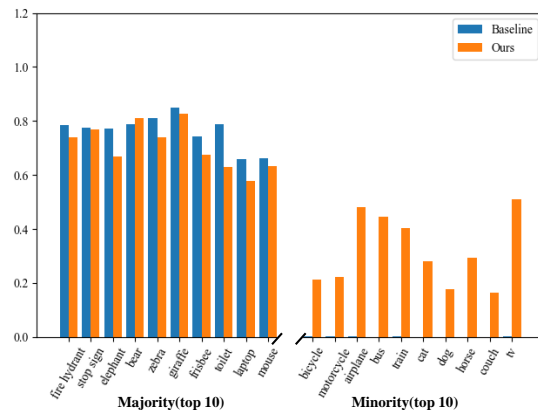

(b) Recall of pseudo labels

Figure 1: Comparisons between our method and the baseline (Soft Teacher) regarding the precision and recall metrics of pseudo labels of each class in MS-COCO sub task. We select Top-10 classes for majority classes and minority classes based on the AP performance, respectively.

for the majority classes while ignoring the minority classes. However, our proposed framework achieves a better trade-off between the precision and recall metrics of both majority classes and minority classes. Specifically, our method has a higher recall of pseudo labels for minority classes and preserves the high precision and recall of pseudo labels of majority classes. This demonstrates that our method can effectively alleviate the confirmation bias towards majority classes.

To illustrate the second aspect of the confirmation bias, we analyze the precision and recall metrics of pseudo labels in LVIS sub-task for Soft Teacher(baseline), the Long-tailed method EqLV2[7], and our method. In this task, the implicit instances of minority classes in unlabeled data are always

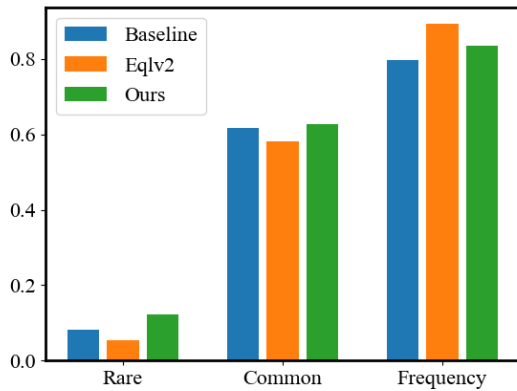

(a) Precision of pseudo labels

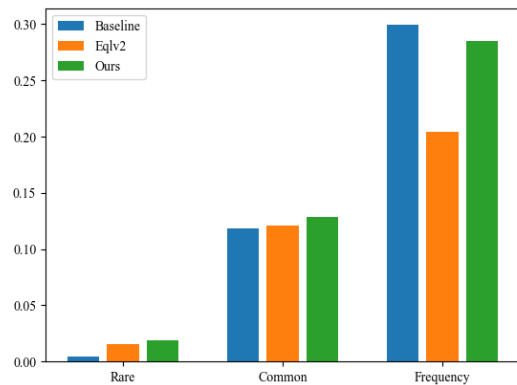

(b) Recall of pseudo labels

Figure 2: Comparisons between the baseline (Soft Teacher), EqLV2 and our method regarding the precision and recall metrics of pseudo labels of each class in LVIS sub task.

scarce. The pseudo labels for minority classes are prone to be incorrect and thus introduce noises for the detector in the training process. The reasons are two-fold: (1) Since the ground truth annotations for these classes are few, it is hard for the model to learn sufficient knowledge for these classes to generate high-quality pseudo labels. (2) Different from the classification task, there are lots of instances of other classes and uncorrelated instances (regarded as background, for example) in an image. As ground truth labels and the implicit instances in unlabeled images are scarce, the learning of detectors is heavily interfered with by incorrect pseudo labels from instances from other classes and uncorrelated instances. As shown in Fig. 2, the precision of pseudo labels of rare classes is much lower than that of common and frequency classes. It demonstrates that most

of pseudo labels for minority classes are incorrect and thus lead to confirmation bias. Although EqLV2 generates more pseudo labels for minority classes than the Baseline, the precision of these pseudo labels is lower. In contrast, our method generates more pseudo labels for minority classes with high precision, showing superiority to combat the confirmation bias.

### 5. Model Analysis

We present more model analysis by answering the following two questions: (1) Do we have more balanced gradients in training? (2) Do we have better representations?

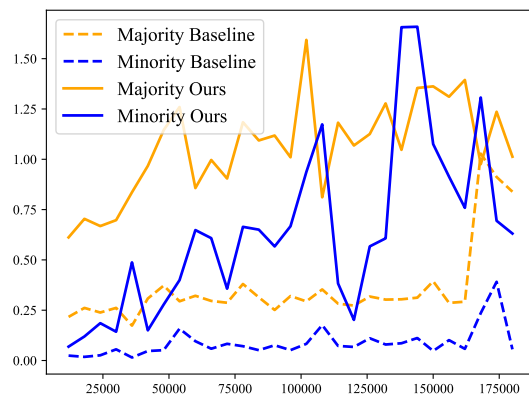

Figure 3: Comparisons between our method and the baseline (Soft Teacher) regarding the averaged gradient norm of the majority classes and that of the minority classes during the training process. The dashed dot lines denote the baseline model and the solid lines denote our method. The YELLOW lines represent the mean gradient norm of the majority classes and the BLUE lines denote the mean gradient norm of the minority classes.

**Do we have more balanced gradients in training?** We present the comparisons between our method and the baseline (Soft Teacher) regarding the averaged gradient norm of the majority classes and that of the minority classes during the training process in Fig. 3. According to Fig. 3, it is clear that (1) our method exhibits a higher gradient norm than that of the baseline in both majority and minority classes; (2) as the training proceeds, our method shows that the gradient norm gap between the majority classes and the minority classes becomes smaller while the baseline model does not show such a property. These two observations manifest that our method has achieved a more balanced gradient in training. Besides, we further present the positive and negative gradient norms for a representative minority class (laptop) in Fig 5, which shows that the positive and negative gradi-

ent norms can be **equalized** with GbR.

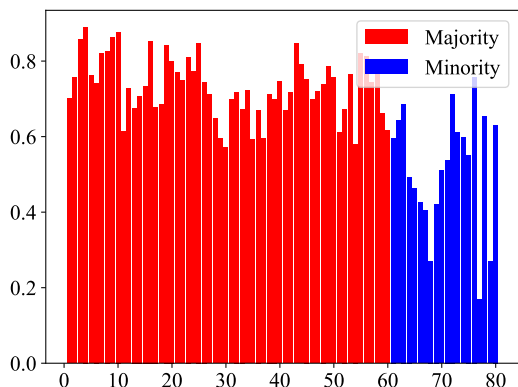

(a) Baseline

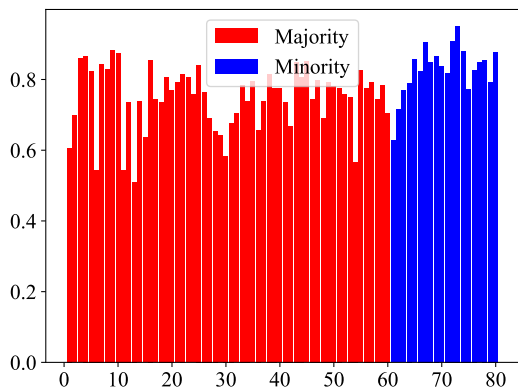

(b) Ours

Figure 4: Comparisons between our method and the baseline (Soft Teacher) regarding the mean prediction score of each class.

**Do we have better representations?** We adopt the mean prediction score as the metric to measure whether the representation of a class is better or not. That is, the higher the averaged prediction scores for a class, the better the representation of that class is. Thus, we visualize the mean prediction score of each class when the model is converged. According to Fig. 4, for the majority classes, the mean prediction scores of both our method and the baseline are almost the same, suggesting that they both have good representations; for the minority classes, it is obvious that the prediction scores of our method are much higher than that of the baseline, demonstrating that our method has better representations for the minority classes which result in a class balanced object detector. Besides, as shown in Fig 6, we

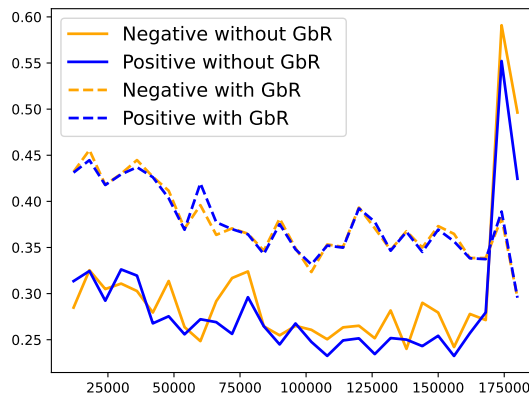

Figure 5: The visualization of positive and negative gradients with and without GbR.

also visualize the class logits with or without our method. The class logits with GbR are much more balanced than logits without GbR. It shows our method can level off the class logits during training to learn better representations.

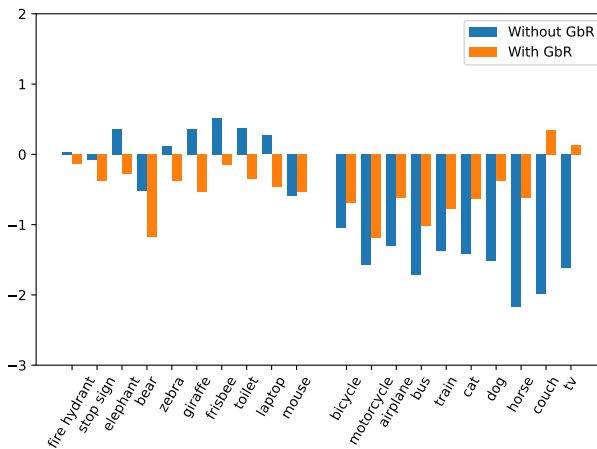

Figure 6: The comparison of class logits with and without GbR.

## 6. More Implements Details

To stabilize the gradient statistics in the gradients matrix  $\tilde{G}$ , we propose to employ a warm-up process before solving the analytical solutions for the class-wise weights  $w_i (i = 1, \dots, n + 1)$ . Specifically, we adopt 4000 iterations for the MS-COCO sub-task and 16000 iterations for the MS-COCO  $\rightarrow$  Object365 and LVIS sub-task. During the warm-up process, the Gradient-based Reweighting(GbR) module and the Gradient-based Reweighting(GbT) module



Table 4: Performance of our method with Unbiased Teacher[3] on the split1 of MS-COCO sub-task

| Methods          | all  | maj  | min  |
|------------------|------|------|------|
| Unbiased Teacher | 22.3 | 28.6 | 5.3  |
| + Ours           | 24.7 | 28.5 | 13.2 |

Table 5: Comparisons with long-tailed learning methods on the split1 of MS-COCO sub-task.

| Methods               | all         | maj         | min         |
|-----------------------|-------------|-------------|-------------|
| Logits Adjustments    | 24.6        | 30.6        | 6.5         |
| Classifier Retraining | 24.5        | 29.9        | 8.4         |
| Ours                  | <b>26.5</b> | <b>30.7</b> | <b>13.9</b> |

are not turned on in training. That is  $w_i = 1$  and  $\theta_i = \theta$  for  $i = 1, 2, \dots, n + 1$ . We will also release our dataset and code in the future to show more details.

## 7. Experiments on more SSOD detectors

We also conduct the experiments with Unbiased Teacher[3] in Tab 4. The results demonstrate the generalization of our method on different SSOD detectors.

## 8. Comparisons with more long-tailed learning methods

We compare our method with Logits Adjustments[4] and Classifier Retraining[2] in Tab 5. It shows our method beat existing long-tailed learning methods by a clear margin, demonstrating the effectiveness of our method.

## 9. Extended Descriptions of Gradient-based Reweighting

We present a simple example to elaborate on the calculation of the gradient matrix  $\tilde{G}$  shown in Fig. 7. The class-wise weights are the analytical solutions of the linear equations regarding  $\tilde{G}$ . The calculated weights are then applied to the classification losses  $f^l(\cdot)$  and  $f^u(\cdot)$  to achieve class-balanced training at the gradient level and to the Gradient-based Thresholding module to acquire more pseudo labels for the minority classes at the image-level.

## 10. Qualitative Comparisons against Other Methods

We present several examples of qualitative comparisons between our method and current methods, including Soft Teacher[9], C2AM loss[8], DASO[5] and DeFRCN[6] shown in Fig. 8 for the MS-COCO sub-task, Fig. 9 for the MS-COCO  $\rightarrow$  Object365 sub-task and Fig. 10 for the LVIS sub-task. Obviously, our method generates more detection

results for minority classes while keeping the same amount of detection results for the majority classes, leading to a better overall performance improvement on both sub-tasks.

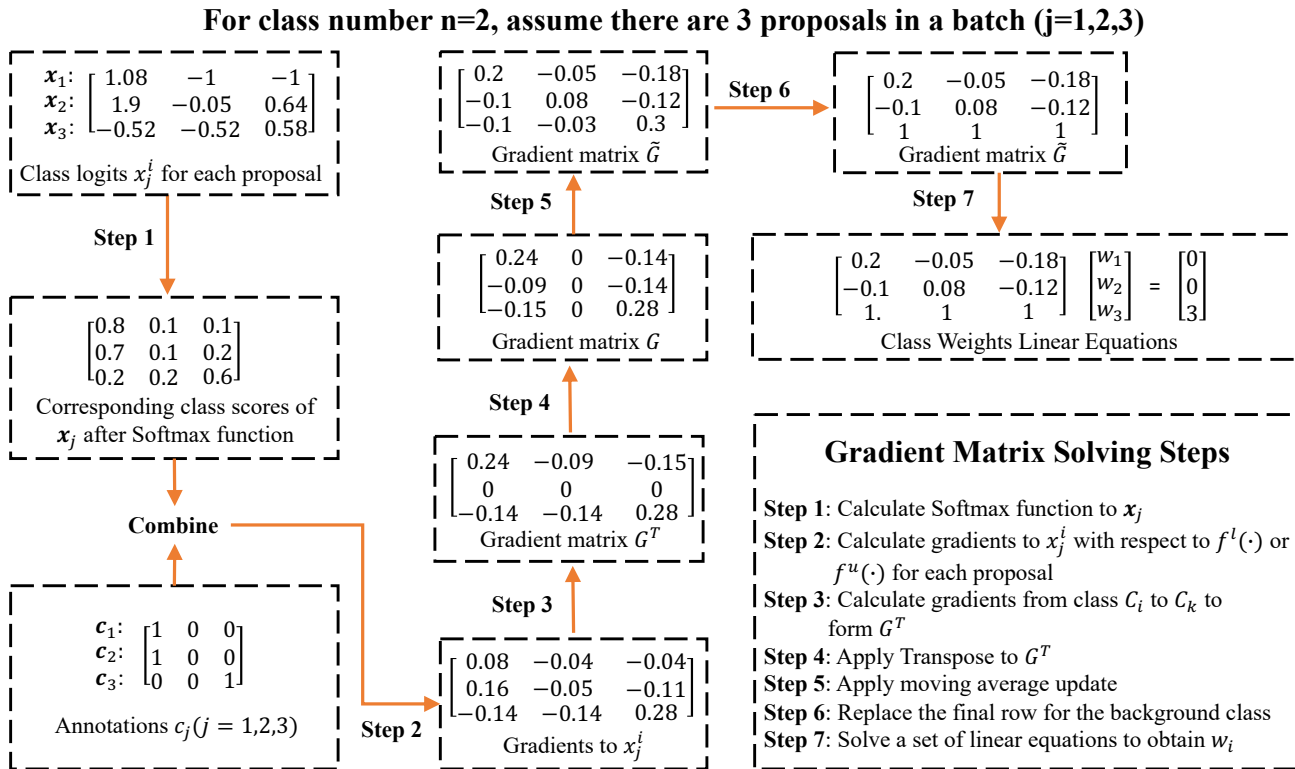

Figure 7: A simple example to illustrate the process of Gradient-based Reweighting.

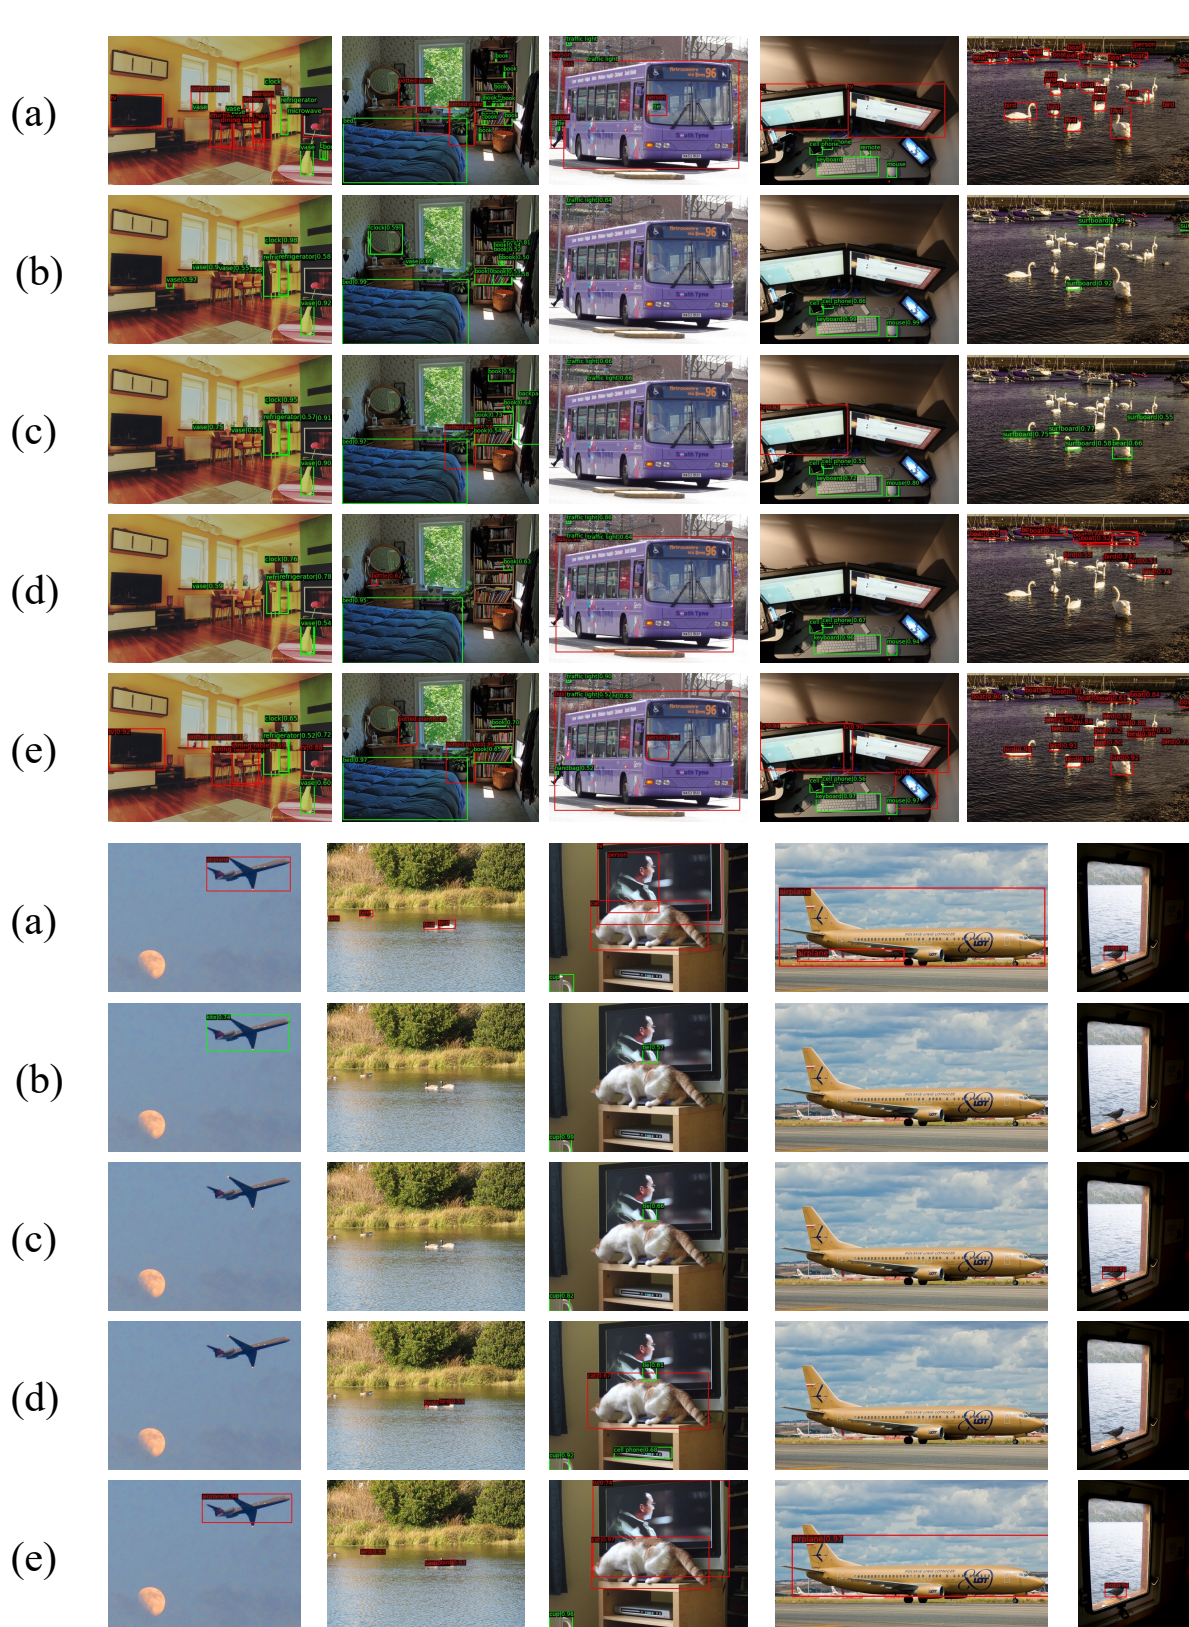

Figure 8: Qualitative comparisons against other methods in MS-COCO sub-task:(a) Ground Truth labels; (b) Soft Teacher[9]; (c) DASO[5]; (d) DeFRCN[6]; (e) Ours. The bounding boxes with RED borderline are predicted as minority classes while the bounding boxes with GREEN borderline are predicted as majority classes.

648  
649  
650  
651  
652  
653  
654  
655  
656  
657  
658  
659  
660  
661  
662  
663  
664  
665  
666  
667  
668  
669  
670  
671  
672  
673  
674  
675  
676  
677  
678  
679  
680  
681  
682  
683  
684  
685  
686  
687  
688  
689  
690  
691  
692  
693  
694  
695  
696  
697  
698  
699  
700  
701

702  
703  
704  
705  
706  
707  
708  
709  
710  
711  
712  
713  
714  
715  
716  
717  
718  
719  
720  
721  
722  
723  
724  
725  
726  
727  
728  
729  
730  
731  
732  
733  
734  
735  
736  
737  
738  
739  
740  
741  
742  
743  
744  
745  
746  
747  
748  
749  
750  
751  
752  
753  
754  
755



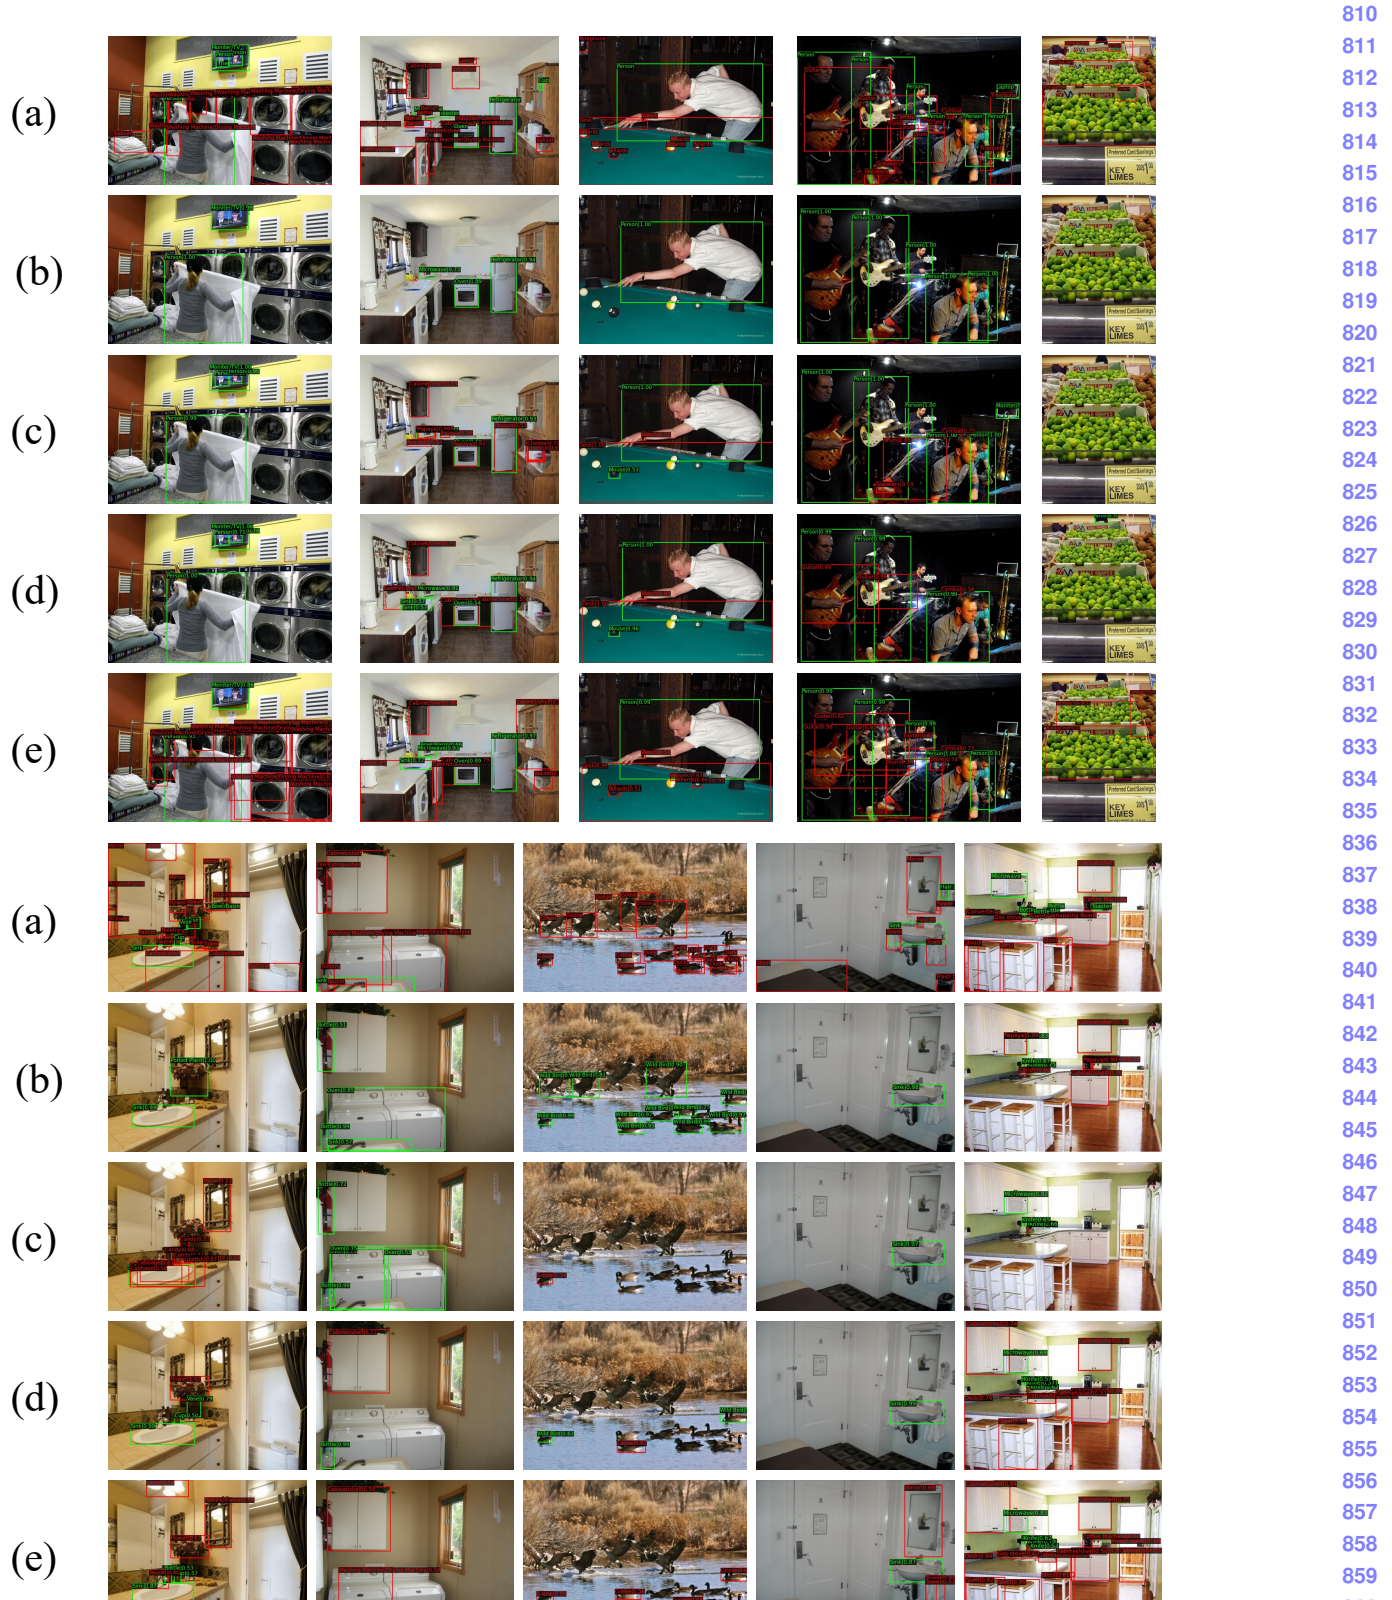

Figure 9: Qualitative comparisons against other methods in MS-COCO → Object365 sub-task:(a) Ground Truth labels; (b) Soft Teacher[9]; (c) Eqlv2[7]; (d) DeFRCN[6]; (e) Ours. The bounding boxes with RED borderline are predicted as minority classes while the bounding boxes with GREEN borderline are predicted as majority classes.



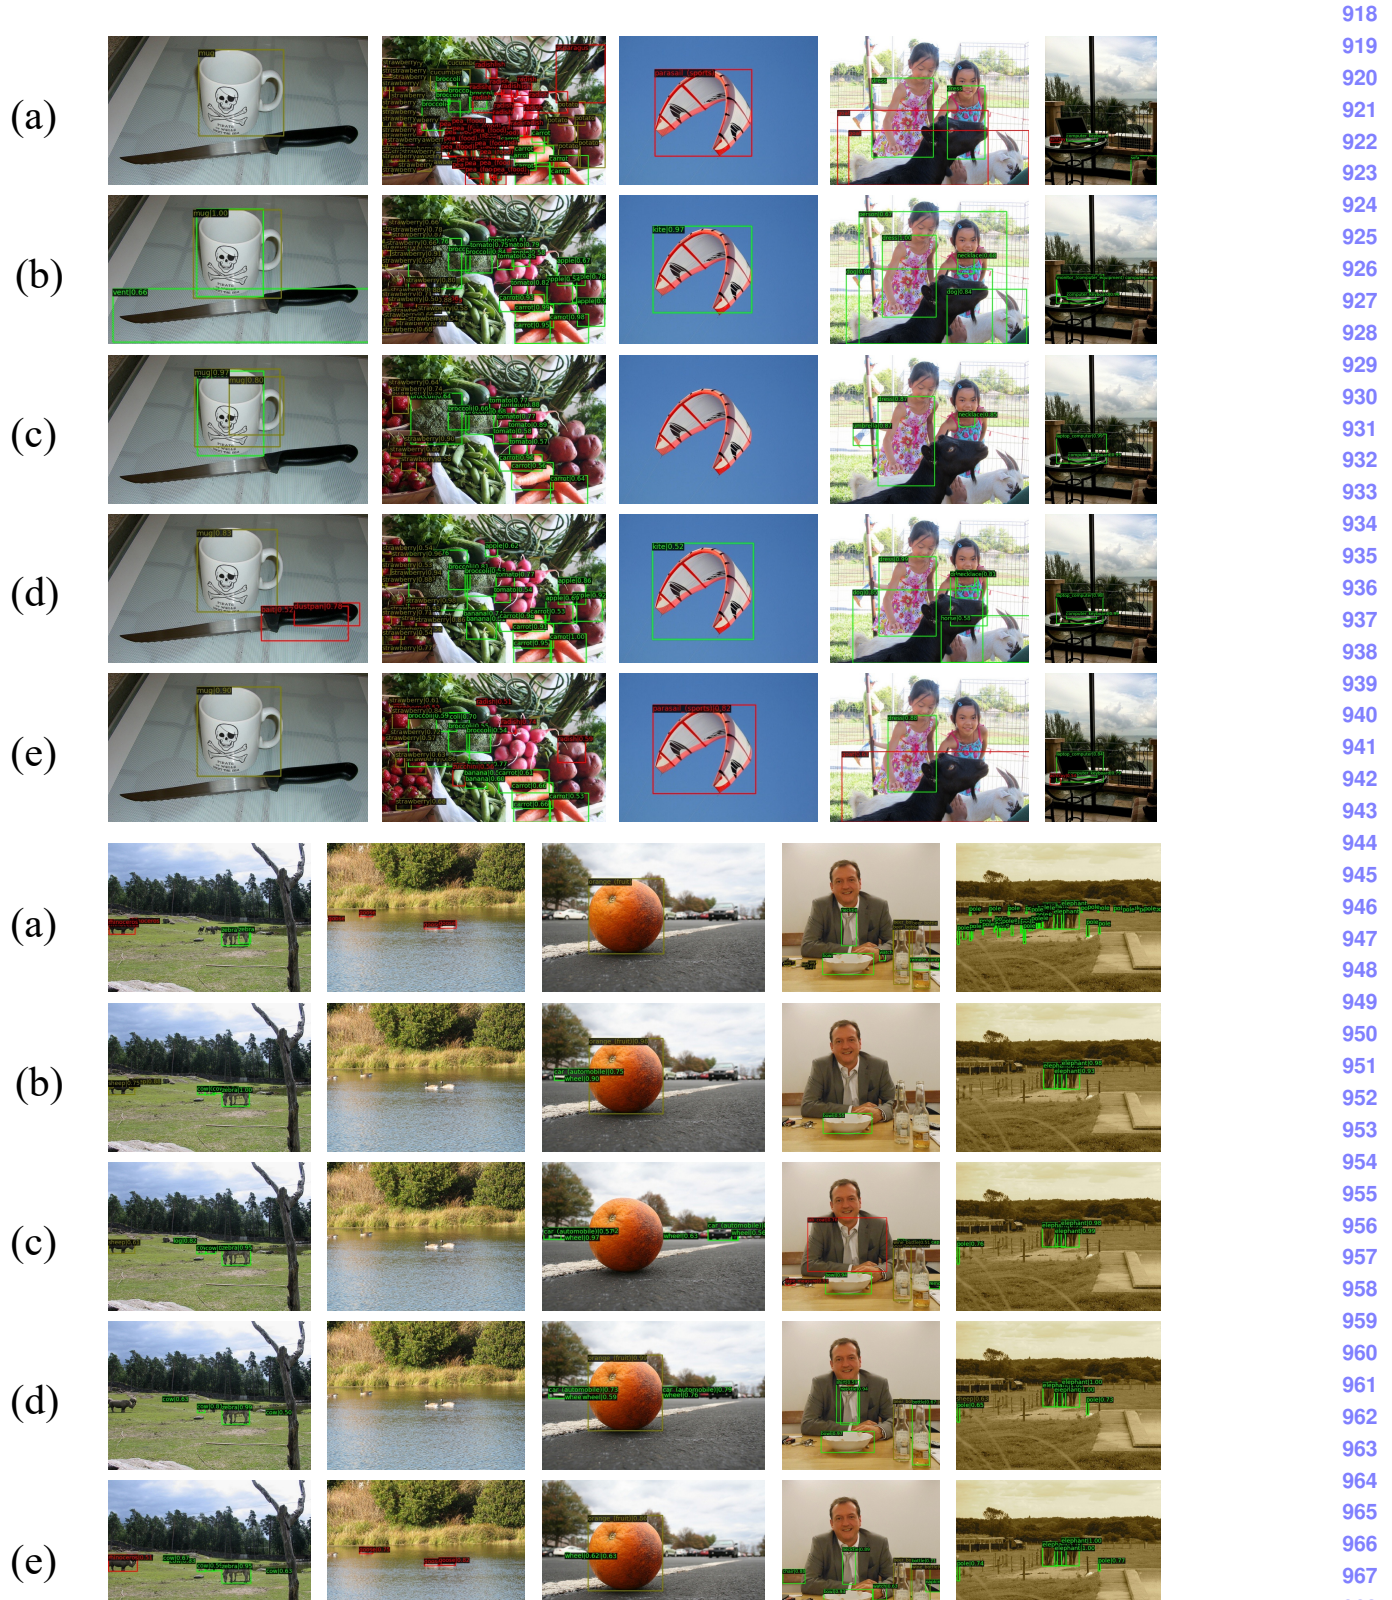

Figure 10: Qualitative comparisons against other methods in LVIS sub-task:(a) Ground Truth labels; (b) Soft Teacher[9]; (c)EqLv2[7]; (d) DASO[5]; (e) Ours. The bounding boxes in RED, YELLOW and GREEN are predicted as rare classes, common classes and frequent classes, respectively. Note that the instances in LVIS dataset are not fully annotated.



972 **References**

973 [1] Eric Arazo, Diego Ortego, Paul Albert, Noel E O’Connor, and  
974 Kevin McGuinness. Pseudo-labeling and confirmation bias in  
975 deep semi-supervised learning. In *2020 International Joint  
976 Conference on Neural Networks (IJCNN)*, pages 1–8. IEEE,  
977 2020. 2

978 [2] Bingyi Kang, Saining Xie, Marcus Rohrbach, Zhicheng Yan,  
979 Albert Gordo, Jiashi Feng, and Yannis Kalantidis. Decoupling  
980 representation and classifier for long-tailed recognition. *arXiv  
981 preprint arXiv:1910.09217*, 2019. 5

982 [3] Yen-Cheng Liu, Chih-Yao Ma, Zijian He, Chia-Wen Kuo, Kan  
983 Chen, Peizhao Zhang, Bichen Wu, Zsolt Kira, and Peter Va-  
984 jda. Unbiased teacher for semi-supervised object detection.  
985 *arXiv preprint arXiv:2102.09480*, 2021. 5

986 [4] Aditya Krishna Menon, Sadeep Jayasumana, Ankit Singh  
987 Rawat, Himanshu Jain, Andreas Veit, and Sanjiv Kumar.  
988 Long-tail learning via logit adjustment. *arXiv preprint  
989 arXiv:2007.07314*, 2020. 5

990 [5] Youngtaek Oh, Dong-Jin Kim, and In So Kweon. Daso:  
991 Distribution-aware semantics-oriented pseudo-label for im-  
992 balanced semi-supervised learning. In *Proceedings of the  
993 IEEE/CVF Conference on Computer Vision and Pattern  
994 Recognition*, pages 9786–9796, 2022. 5, 7, 9

995 [6] Limeng Qiao, Yuxuan Zhao, Zhiyuan Li, Xi Qiu, Jianan Wu,  
996 and Chi Zhang. Defrcn: Decoupled faster r-cnn for few-  
997 shot object detection. In *Proceedings of the IEEE/CVF Inter-  
998 national Conference on Computer Vision*, pages 8681–8690,  
999 2021. 5, 7, 8

1000 [7] Jingru Tan, Xin Lu, Gang Zhang, Changqing Yin, and Quan-  
1001 quan Li. Equalization loss v2: A new gradient balance ap-  
1002 proach for long-tailed object detection. In *Proceedings of the  
1003 IEEE/CVF conference on computer vision and pattern recog-  
1004 nition*, pages 1685–1694, 2021. 2, 8, 9

1005 [8] Tong Wang, Yousong Zhu, Yingying Chen, Chaoyang Zhao,  
1006 Bin Yu, Jinqiao Wang, and Ming Tang. C2am loss: Chasing  
1007 a better decision boundary for long-tail object detection. In  
1008 *Proceedings of the IEEE/CVF Conference on Computer Vi-  
1009 sion and Pattern Recognition*, pages 6980–6989, 2022. 5

1010 [9] Mengde Xu, Zheng Zhang, Han Hu, Jianfeng Wang, Lijuan  
1011 Wang, Fangyun Wei, Xiang Bai, and Zicheng Liu. End-to-end  
1012 semi-supervised object detection with soft teacher. In *Pro-  
1013 ceedings of the IEEE/CVF International Conference on Com-  
1014 puter Vision*, pages 3060–3069, 2021. 5, 7, 8, 9

1026  
1027  
1028  
1029  
1030  
1031  
1032  
1033  
1034  
1035  
1036  
1037  
1038  
1039  
1040  
1041  
1042  
1043  
1044  
1045  
1046  
1047  
1048  
1049  
1050  
1051  
1052  
1053  
1054  
1055  
1056  
1057  
1058  
1059  
1060  
1061  
1062  
1063  
1064  
1065  
1066  
1067  
1068  
1069  
1070  
1071  
1072  
1073  
1074  
1075  
1076  
1077  
1078  
1079
